# Supplementary material for: Composite Uremic Load and Physical Performance in Hemodialysis Patients: A Cross-Sectional Study
Source: PubMed Central journal article supplement (PMC7076769; doi:10.3390/toxins12020135), 2020-02-22
Supplement: toxins-12-00135-s001.pdf [file toxins-12-00135-s001.pdf]

# Supplementary Materials: Composite Uremic Load and Physical Performance in Hemodialysis Patients: A Cross-Sectional Study

Karsten Vanden Wyngaert \*, Amaryllis H. Van Craenenbroeck, Els Holvoet, Patrick Calders, Wim Van Biesen and Sunny Eloot

**Table S1.** Detailed association between relevant associations of uremic toxins and domains of physical performance.

| Variable  | Handgrip Strength |         | Quadriceps Strength |         | STS            |         |
|-----------|-------------------|---------|---------------------|---------|----------------|---------|
|           | Estimate (SE)     | p Value | Estimate (SE)       | p Value | Estimate (SE)  | p Value |
| IS total  | -34.89 (12.7)     | 0.008   | -286.28 (123.5)     | 0.024   | 45.09 (32.1)   | 0.166   |
| IS free   | 61.10 (19.9)      | 0.003   | 252.61 (216.6)      | 0.248   | -57.84 (53.3)  | 0.282   |
| pCS total | 30.79 (13.3)      | 0.024   | -199.73 (116.5)     | 0.308   | -15.80 (31.8)  | 0.621   |
| pCS free  | -31.55 (19.8)     | 0.115   | 227.41 (198.1)      | 0.256   | 20.21 (47.7)   | 0.673   |
| pCG total | -16.57 (14.8)     | 0.266   | -519.82 (272.9)     | 0.062   | 192.42 (76.7)  | 0.015   |
| pCG free  | -15.44 (14.7)     | 0.298   | 485.41 (271.1)      | 0.078   | -153.87 (76.4) | 0.048   |
| IAA total | 46.58 (18.1)      | 0.012   | 415.88 (217.0)      | 0.060   | -84.41 (57.3)  | 0.146   |
| IAA free  | -53.97 (23.0)     | 0.022   | -650.84 (297.1)     | 0.032   | 134.77 (78.5)  | 0.015   |
| HA total  | 19.93 (20.1)      | 0.326   | 317.11 (276.7)      | 0.256   | 134.94 (73.6)  | 0.072   |
| HA free   | 2.09 (21.8)       | 0.924   | -278.93 (306.6)     | 0.367   | -190.98 (81.1) | 0.022   |
| CMPF      | -7.26 (7.8)       | 0.358   | -5.68 (64.0)        | 0.930   | 29.26 (16.6)   | 0.082   |
| UA        | 8.99 (7.8)        | 0.256   | -21.89 (65.1)       | 0.738   | -3.39 (16.6)   | 0.839   |

Data are presented as estimated beta-values and estimated standard error (SE), the analyses are controlled for age and gender. Abbreviations: STS, sit-to-stand.

**Table S2.** Functional muscle strength and uremic toxins.

| Uremic Toxin Concentrations (mg/dL) | Sit-to-Stand         |                      |                      | p-Value |
|-------------------------------------|----------------------|----------------------|----------------------|---------|
|                                     | Good (<13 s)         | Moderate (13 s–49 s) | Poor (50 s)          |         |
| IS total                            | 1.883 [1.341; 2.426] | 1.613 [1.108; 2.117] | 1.708 [1.259; 2.157] | 0.617   |
| IS free                             | 0.121 [0.068; 0.175] | 0.143 [0.048; 0.238] | 0.132 [0.085; 0.180] | 0.589   |
| pCS total                           | 3.307 [2.513; 4.102] | 3.252 [2.544; 3.961] | 3.640 [2.938; 4.342] | 0.753   |
| pCS free                            | 0.237 [0.151; 0.323] | 0.280 [0.146; 0.415] | 0.292 [0.220; 0.364] | 0.278   |
| pCG total                           | 0.215 [0.118; 0.312] | 0.351 [0.168; 0.534] | 0.355 [0.233; 0.478] | 0.278   |
| pCG free                            | 0.200 [0.107; 0.292] | 0.328 [0.156; 0.500] | 0.319 [0.208; 0.430] | 0.328   |
| IAA total                           | 0.157 [0.111; 0.202] | 0.177 [0.097; 0.256] | 0.157 [0.107; 0.207] | 0.925   |
| IAA free                            | 0.048 [0.030; 0.065] | 0.065 [0.014; 0.116] | 0.054 [0.027; 0.081] | 0.934   |
| HA total                            | 2.248 [1.484; 3.012] | 2.980 [1.671; 4.288] | 2.343 [1.477; 3.210] | 0.991   |
| HA free                             | 1.203 [0.756; 1.652] | 1.804 [0.874; 2.735] | 1.272 [0.769; 1.776] | 0.970   |

|      |                         |                      |                         |       |
|------|-------------------------|----------------------|-------------------------|-------|
| CMPF | 0.570 [0.299;<br>0.841] | 0.593 [0.390; 0.796] | 0.754 [0.436;<br>1.072] | 0.411 |
| UA   | 6.639 [6.137;<br>7.140] | 6.173 [5.591; 6.756] | 6.042 [5.467;<br>6.616] | 0.191 |

Data are presented as median and confidence interval [CI]; patients were allocated to a good, moderate or poor lower limb muscle function group based on the tertiles of the Sit-to-Stand test, <13 s, from 13 to 49 s, and 50 s or more, respectively.

**Table S3.** Upper limb muscle strength and uremic toxins.

| Uremic Toxin Concentrations (mg/dL) | Handgrip Strength       |                      |                         | p-Value |
|-------------------------------------|-------------------------|----------------------|-------------------------|---------|
|                                     | High (>103%)            | Moderate (83–103%)   | Low (<83%)              |         |
| IS total                            | 1.509 [1.082;<br>1.935] | 1.792 [1.318; 2.265] | 1.924 [1.337;<br>2.511] | 0.519   |
| IS free                             | 0.098 [0.050;<br>0.146] | 0.157 [0.066; 0.249] | 0.142 [0.090;<br>0.195] | 0.351   |
| pCS total                           | 3.095 [2.564;<br>3.621] | 3.789 [3.020; 4.557] | 3.344 [2.467;<br>4.221] | 0.364   |
| pCS free                            | 0.206 [0.153;<br>0.259] | 0.325 [0.190; 0.460] | 0.281 [0.191;<br>0.372] | 0.307   |
| pCG total                           | 0.234 [0.123;<br>0.346] | 0.314 [0.167; 0.461] | 0.379 [0.225;<br>0.532] | 0.477   |
| pCG free                            | 0.214 [0.107;<br>0.320] | 0.293 [0.155; 0.432] | 0.345 [0.205;<br>0.485] | 0.462   |
| IAA total                           | 0.138 [0.104;<br>0.172] | 0.204 [0.123; 0.285] | 0.148 [0.098;<br>0.198] | 0.357   |
| IAA free                            | 0.038 [0.026;<br>0.051] | 0.075 [0.026; 0.124] | 0.054 [0.025;<br>0.082] | 0.377   |
| HA total                            | 2.029 [1.393;<br>2.666] | 2.814 [1.665; 3.964] | 2.730 [1.589;<br>3.871] | 0.843   |
| HA free                             | 1.036 [0.681;<br>1.392] | 1.692 [0.839; 2.544] | 1.552 [0.891;<br>2.213] | 0.710   |
| CMPF                                | 0.458 [0.307;<br>0.611] | 0.775 [0.490; 1.060] | 0.700 [0.355;<br>1.046] | 0.160   |
| UA                                  | 6.162 [5.591;<br>6.733] | 6.565 [5.977; 7.152] | 6.120 [5.613;<br>6.627] | 0.545   |

Data are presented as median and confidence interval [CI]; patients were allocated to a high, moderate or low handgrip strength group based on the tertiles of the predicted handgrip strength, >103%, from 83 to 103%, and <83% respectively.

**Table S4.** Lower limb muscle strength and uremic toxins.

| Uremic Toxin Concentrations (mg/dL) | Quadriceps Muscle Strength |                      |                         | p-Value |
|-------------------------------------|----------------------------|----------------------|-------------------------|---------|
|                                     | High (>64%)                | Moderate (46–64%)    | Low (<46%)              |         |
| IS total                            | 1.235 [0.844;<br>1.625]    | 2.002 [1.552; 2.452] | 1.970 [1.384;<br>2.555] | 0.013   |
| IS free                             | 0.075 [0.046;<br>0.105]    | 0.146 [0.083; 0.209] | 0.176 [0.085;<br>0.267] | 0.026   |
| pCS total                           | 2.922 [2.307;<br>3.536]    | 3.899 [3.091; 4.707] | 3.373 [2.658;<br>4.088] | 0.218   |
| pCS free                            | 0.196 [0.144;<br>0.247]    | 0.312 [0.214; 0.409] | 0.303 [0.172;<br>0.433] | 0.193   |

|           |                      |                      |                      |       |
|-----------|----------------------|----------------------|----------------------|-------|
| pCG total | 0.217 [0.117; 0.317] | 0.335 [0.195; 0.474] | 0.371 [0.205; 0.537] | 0.301 |
| pCG free  | 0.201 [0.105; 0.296] | 0.312 [0.181; 0.443] | 0.334 [0.182; 0.487] | 0.279 |
| IAA total | 0.126 [0.092; 0.160] | 0.179 [0.130; 0.229] | 0.185 [0.101; 0.269] | 0.096 |
| IAA free  | 0.035 [0.023; 0.047] | 0.054 [0.036; 0.072] | 0.078 [0.023; 0.134] | 0.076 |
| HA total  | 2.081 [1.259; 2.903] | 2.413 [1.659; 3.155] | 3.078 [1.471; 3.166] | 0.556 |
| HA free   | 1.086 [0.616; 1.557] | 1.332 [0.869; 1.795] | 1.862 [0.928; 2.796] | 0.397 |
| CMPF      | 0.547 [0.264; 0.830] | 0.631 [0.434; 0.421] | 0.752 [0.422; 1.082] | 0.181 |
| UA        | 5.960 [5.474; 6.447] | 6.559 [5.986; 7.133] | 6.319 [5.720; 6.919] | 0.240 |

Data are presented as median and confidence interval [CI]; patients were allocated to a high, moderate or low quadriceps muscle strength group based on the tertiles of the predicted quadriceps muscle strength, >64%, between 46 and 64%, and <46% respectively.

**Table S5.** Between-groups of functional prognosis analysis.

| Variable  | Good Functional Prognosis<br>(n = 32) | Poor Functional Prognosis (n = 43) | p Value |
|-----------|---------------------------------------|------------------------------------|---------|
| IS total  | 1.891 [1.469; 2.312]                  | 1.621 [1.246; 1.996]               | 0.148   |
| IS free   | 0.130 [0.082; 0.178]                  | 0.134 [0.078; 0.190]               | 0.453   |
| pCS total | 3.463 [2.859; 4.066]                  | 3.362 [2.792; 3.933]               | 0.855   |
| pCS free  | 0.252 [0.183; 0.321]                  | 2.834 [0.200; 0.367]               | 0.740   |
| pCG total | 0.247 [0.167; 0.327]                  | 0.352 [0.230; 0.473]               | 0.793   |
| pCG free  | 0.230 [0.154; 0.307]                  | 0.321 [0.208; 0.434]               | 0.910   |
| IAA total | 0.180 [0.128; 0.232]                  | 0.151 [0.108; 0.194]               | 0.265   |
| IAA free  | 0.059 [0.034; 0.084]                  | 0.053 [0.025; 0.081]               | 0.688   |
| HA total  | 2.320 [1.642; 2.998]                  | 2.660 [1.819; 3.502]               | 0.805   |
| HA free   | 1.273 [0.851; 1.694]                  | 1.529 [0.956; 2.092]               | 0.839   |
| CMPF      | 0.651 [0.418; 0.884]                  | 0.634 [0.428; 0.840]               | 0.915   |
| UA        | 6.449 [5.941; 6.957]                  | 6.159 [5.757; 6.561]               | 0.520   |

Data are presented as mean and confidence interval [CI]; patients were allocated to a good and poor function prognosis group based on the 300 m cut-off point on the 6MWT.
